# Supplementary material for: Efficient and highly selective boron-doped carbon materials-catalyzed reduction of nitroarenes
Source: Royal Society of Chemistry journal article supplement (doi:10.1039/c5cc01963j), 2015-01-01
Supplement: c5cc01963j1.pdf [file c5cc01963j1.pdf]

# Supporting Information

## **Efficient and highly selective boron-doped carbon materials-catalyzed reduction of nitroarenes †**

Yangming Lin,<sup>ab</sup> Shuchang Wu,<sup>b</sup> Wen Shi,<sup>b</sup> Bingsen Zhang,<sup>b</sup> Jia Wang,<sup>b</sup> Yoong Ahm Kim,<sup>c</sup> Morinobu Endo<sup>d</sup>  
and Dang Sheng Su <sup>\*be</sup>

<sup>a</sup> School of Chemistry and Materials Science, University of Science and Technology of China, Hefei,  
230001, P. R. China

<sup>b</sup> Shenyang National Laboratory for Materials Science, Institute of Metal Research, Chinese Academy  
of Sciences, Shenyang, 110016, P. R. China

<sup>c</sup> School of Polymer Science and Engineering, Chonnam National University, 77 Yongbong-ro, Buk-gu  
Kwangju, 500-757, Republic of Korea

<sup>d</sup> Carbon Institute of Science and Technology, Shinshu University, 4-17-1 Wakasato, Nagano, 380-8553,  
Japan

<sup>e</sup> Department of Inorganic Chemistry, Fritz Haber Institute of the Max Planck Society, Faradayweg 4-6,  
Berlin, 14195, Germany

Corresponding author Tel & Fax: (+86)24-23971577, Email: [dssu@imr.ac.cn](mailto:dssu@imr.ac.cn)

## Materials

Nitrobenzene (99%) were purchased from Aladdin Reagent Co. Ltd., Shanghai, China. Hydrazine monohydrate (85%), and ethanol (AR), were supplied by China Medicine Group Shanghai Chemical Reagent Company. Boric oxide (~1 $\mu$ m, 99.99 %,  $S_{\text{BET}}=16 \text{ m}^2 \text{ g}^{-1}$ ), boron powder (99.99 %), boron nitride (1~2  $\mu$ m, 99.9 %,  $S_{\text{BET}}=22 \text{ m}^2 \text{ g}^{-1}$ ), boric carbide (1~10 $\mu$ m, 98 %,  $S_{\text{BET}}=18 \text{ m}^2 \text{ g}^{-1}$ ) were obtained from Aladdin Co. Carbon nanotubes (CNTs) were bought from Shandong DazhanTechnology Ltd. and were further treated with water-diluted HCl (volume ratio is 1:1) before use. Purified ultra-dispersed nanodiamond (UDD) was supplied from Beijing Grish Hitech Co. (China), produced by detonation and followed by acid washing. The noncombustible contaminations were tested by an inductively coupled plasma emission spectrometer and included Fe < 50 ppm, Cr < 10 ppm, Al < 50 ppm, Cu < 10 ppm, Mg < 10 ppm, Ti < 10 ppm, and Ca <50 ppm. The average particle size was about 5 nm. Boric acid ( $\text{H}_3\text{BO}_3$ ) (Aladdin Co. high purity, 99.999 %) was chose as the dopant. The B-OLC samples were produced by the following procedures: (1) The mixtures with 8 wt %, 15 wt %, 25 wt % boric acid and ultra-dispersed nanodiamond (UDD) were produced by manual mixing for 1 h and then the samples were thermally treated from 25 °C to 100 °C at a very slowly heating rate of 0.5 K $\cdot$ min<sup>-1</sup> in a furnace under argon atmosphere, respectively. (2) The obtained mixtures were further annealed at 1500 °C for 30 min at a heating rate of 5 K $\cdot$ min<sup>-1</sup> in a furnace under argon atmosphere. The final samples were labelled by B-OLC-1, B-OLC-2 and B-OLC-3, respectively. The B-CNTs samples were obtained by the same approach, and the starting material was acid-treated CNTs. The final samples were assigned to B-CNTs-1, B-CNTs-2 and B-CNTs-3, respectively. Pristine OLC and CNTs were prepared by annealing the UDD and acid-treated CNTs at 1500 °C for 30 min. B-CNTs-2-P was synthesized by annealing the mixture of 15 wt% boric acid and CNTs without acid-treated at 1500 °C for 30 min. CNTs-P was obtained by annealing the CNTs without acid-treated at 1500 °C for 30 min as reference.

## Characterization

High-resolution transmission electron microscopy (HRTEM) images were achieved on a FEI Tecnai G2 F20 microscope. The X-ray photoelectron spectroscopy (XPS) spectra was recorded on an ESCALAB 250 XPS system with a monochromatized Al K $\alpha$  X-ray source. Raman spectra of samples on SiO<sub>2</sub>/Si were performed with a LabRam HR800 spectrometer and a He/Ne laser at 532 nm (50 $\times$ objective) was selected as the excitation source. Moreover, the laser power and exposure time were kept well to avoid the damage of samples and the heating effects.

The nitroarenes reduction reactions were carried out in a 25 ml round-bottom flask containing a certain amount of catalyst, 1.23 g of nitrobenzene and 1.5~4.0 equivalent of hydrazine monohydrate. The reaction solution was sampled periodically and analyzed using gas chromatography (Agilent 7890A).

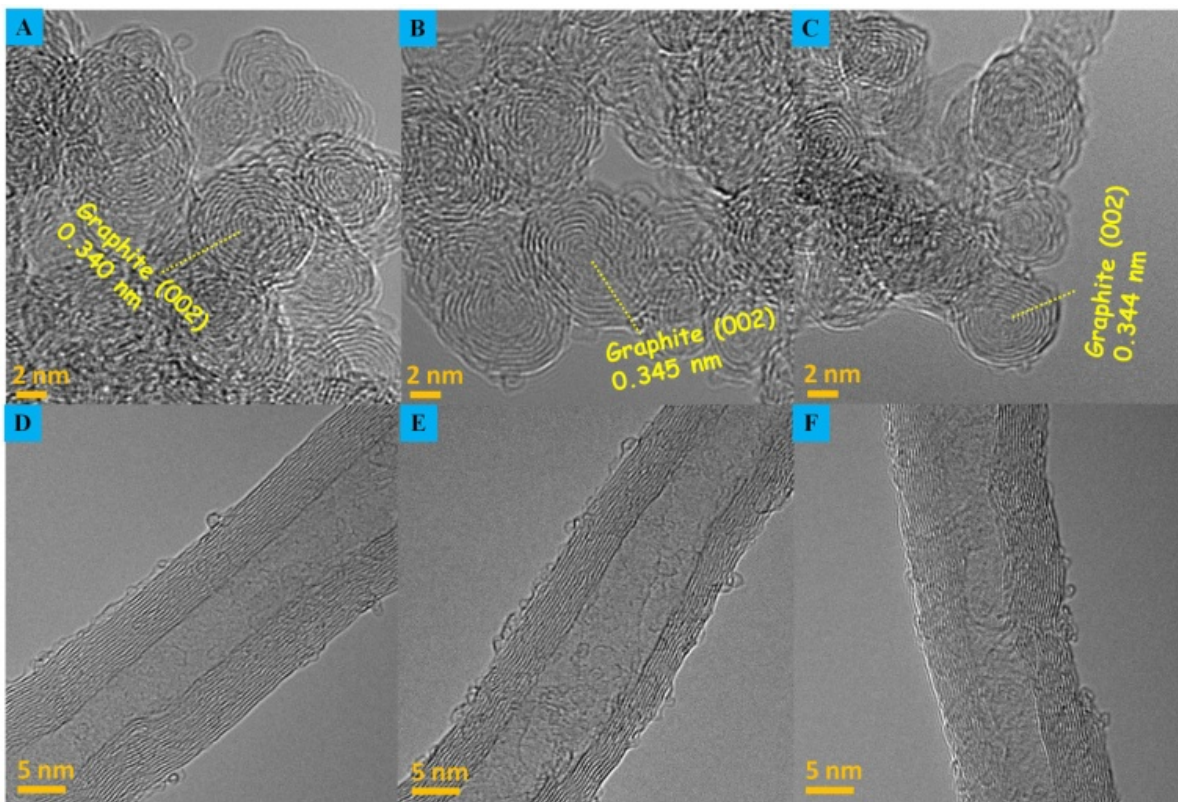

**Fig. S1** HRTEM images of (A) pristine OLC, (B) B-OLC-2, (C) B-OLC-3, (D) pristine CNTs, (E) B-CNTs-2 and (F) B-CNTs-3 samples.

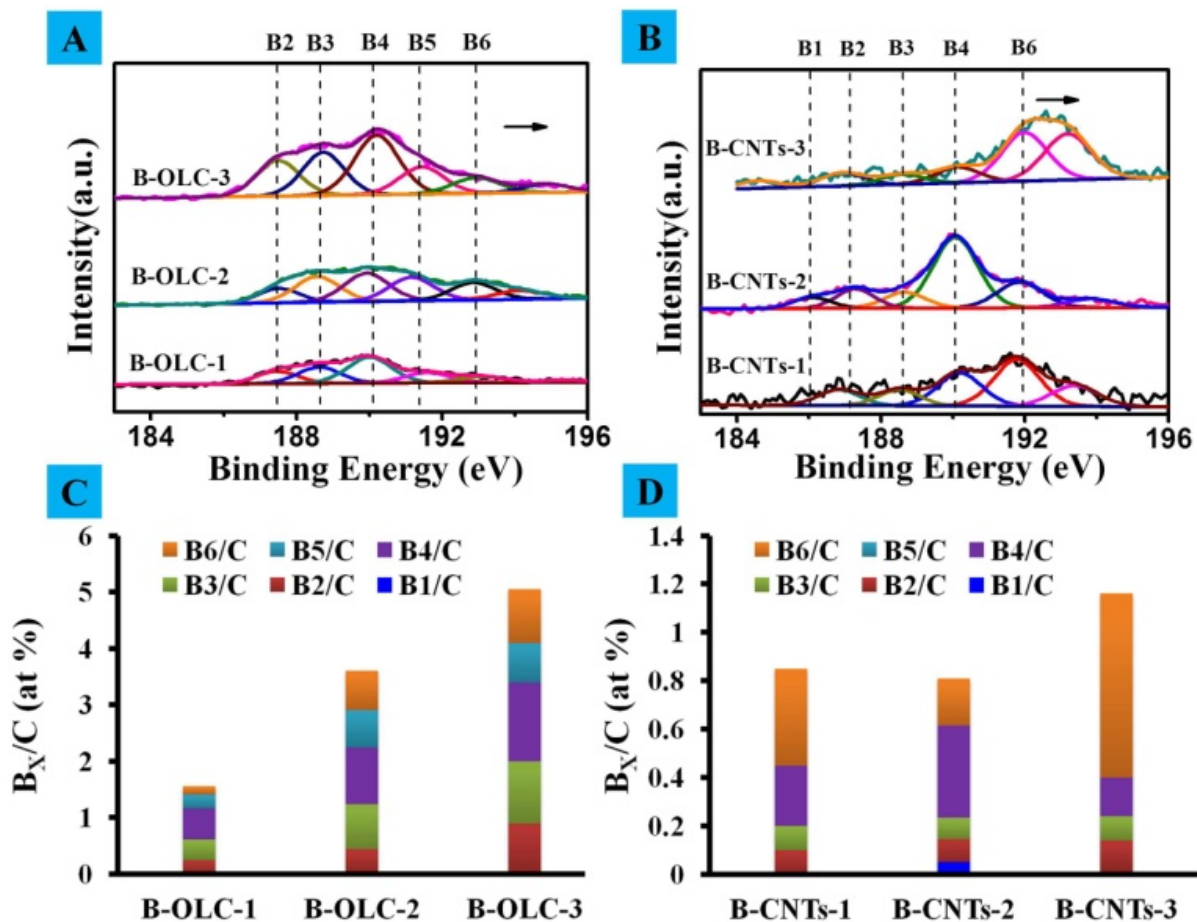

**Fig. S2** XPS B1s spectra of (A) B-OLC and (B) B-CNTs samples. B<sub>x</sub>/C distribution diagram of (C) B-OLC and (D) B-CNTs samples. The XPS spectra were divided by fitting the peak maximum within  $\pm 0.15$  eV and applying a full width at half-maximum (FWHM) of 1.4-1.6 eV.

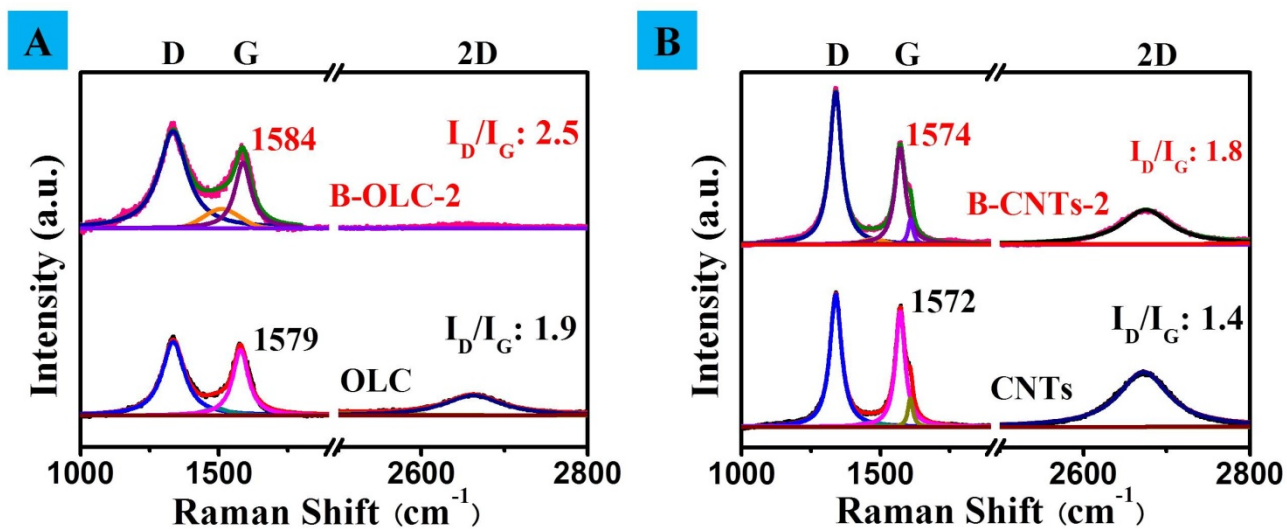

**Fig. S3.** (A) and (B) The deconvolution of the first- and second-order for Raman spectra of the B-OLC-2 and B-CNTs-2 samples using a He-Ne laser ( $\lambda=532$  nm), respectively.

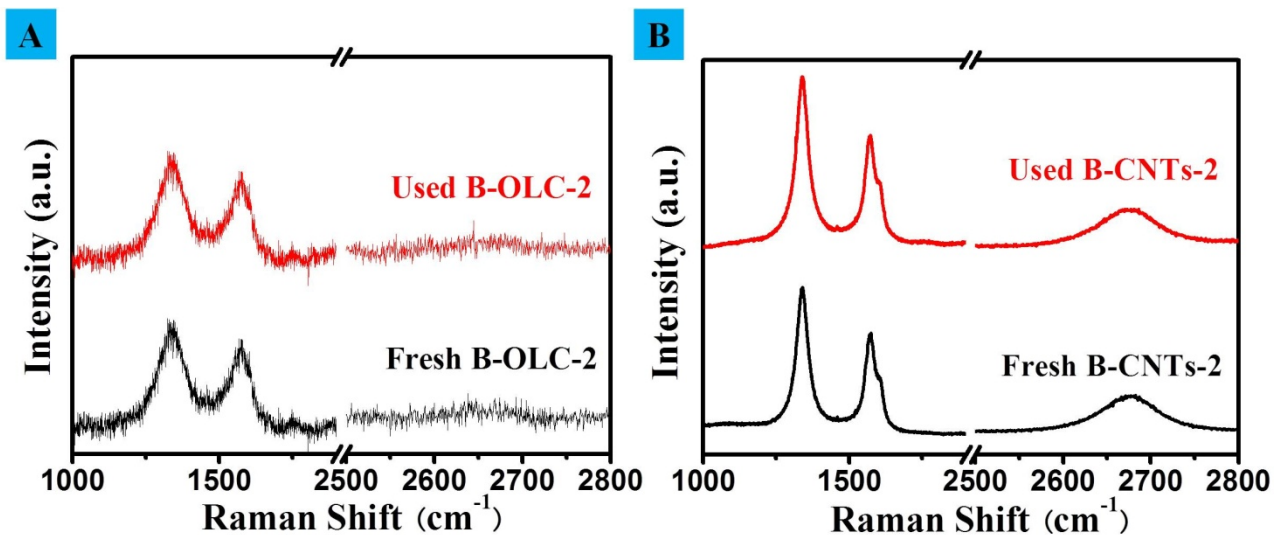

**Fig. S4.** (A) Raman spectra of fresh B-OLC-2 and used B-OLC-2 (after ten cycles). (B) Raman spectra of fresh B-CNTs-2 and used B-CNTs-2 (after ten cycles).

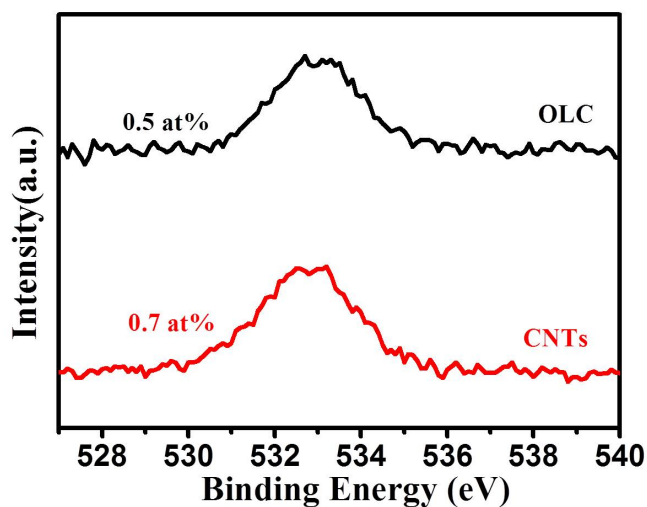

**Fig. S5.** XPS O1s spectra of pristine OLC and CNTs.

**Table S1.** Catalytic activity of different catalysts for the nitrobenzene reduction<sup>a</sup>.

| Entry          | Catalyst                      | $S_{\text{BET}}$<br>( $\text{m}^2 \text{g}^{-1}$ ) | Normalized<br>Value<br>( $\text{m}^2$ ) <sup>c</sup> | Con. (%) | Sel.<br>(%) |
|----------------|-------------------------------|----------------------------------------------------|------------------------------------------------------|----------|-------------|
| 1              | ----                          | ----                                               | ----                                                 | 4.8      | 95.6        |
| 2 <sup>b</sup> | B-OLC-2                       | 400                                                | 0.8                                                  | 23.2     | 97.3        |
| 3 <sup>c</sup> | B-CNTs-2                      | 179                                                | 0.716                                                | 31.8     | 98.1        |
| 4 <sup>d</sup> | B                             | ----                                               | ----                                                 | 5.0      | 95          |
| 5 <sup>d</sup> | B <sub>2</sub> O <sub>3</sub> | 16                                                 | 0.64                                                 | 5.1      | 96.1        |
| 6 <sup>d</sup> | BN                            | 22                                                 | 0.88                                                 | 5.3      | 95.5        |
| 7 <sup>d</sup> | B <sub>4</sub> C              | 18                                                 | 0.72                                                 | 5.4      | 96.5        |

<sup>a</sup> Reaction condition: 10 mmol (1.23 g) substrate, 1.5 equiv N<sub>2</sub>H<sub>4</sub>, 100 °C, 4 h. <sup>b</sup> 2 mg catalyst. <sup>c</sup> 4 mg catalyst. <sup>d</sup> 40 mg

catalyst. <sup>e</sup> The normalized value = specific surface area( $\text{m}^2/\text{g}$ ) $\times$ catalyst mass (g)
